# Supplementary material for: Proteomic profiling of small-molecule inhibitors reveals dispensability of MTH1 for cancer cell survival
Source: PubMed Central journal article supplement (PMC4876372; doi:10.1038/srep26521), 2016-05-23
Supplement: srep26521-s1.pdf [file srep26521-s1.pdf]

## **Supplementary Information for**

### **Proteomic profiling of small-molecule inhibitors reveals dispensability of MTH1 for cancer cell survival**

Tatsuro Kawamura<sup>1</sup>, Makoto Kawatani<sup>1</sup>, Makoto Muroi, Yasumitsu Kondoh, Yushi Futamura, Harumi Aono, Miho Tanaka, Kaori Honda, and Hiroyuki Osada<sup>\*</sup>

Chemical Biology Research Group, RIKEN Center for Sustainable Resource Science (CSRS), 2-1 Hirosawa, Wako, Saitama 351-0198, Japan

<sup>1</sup>These authors contributed equally to this work.

<sup>\*</sup>To whom correspondence should be addressed: Hiroyuki Osada, Chemical Biology Research Group, RIKEN Center for Sustainable Resource Science (CSRS), 2-1 Hirosawa, Wako, Saitama 351-0198, Japan, Tel: +81-48-467-9541; Fax: +81-48-462-4669; E-mail: hisyo@riken.jp

#### **This PDF file includes:**

Supplementary Methods

Supplementary References

Supplementary Table S1

Supplementary Figs. S1 to S7

## **Supplementary Methods**

### **Cell culture**

Human cancer cell lines HeLa (cervical cancer), MIA PaCa-2 (pancreatic cancer), A431 (epidermoid carcinoma), and human embryonic kidney derived cell line HEK293T were cultured in Dulbecco's Modified Eagle's Medium (DMEM; Invitrogen) containing 10% fetal bovine serum (FBS), penicillin G (50 units/mL) and streptomycin (50 µg/mL). Human cancer cell lines Panc-1 (pancreatic cancer) and Jurkat (T cell lymphoma) were cultured in RPMI (Gibco) containing 10% FBS, penicillin G (50 units/mL) and streptomycin (50 µg/mL). Human osteosarcoma cell line MG-63, mouse embryonic fibroblast NIH3T3 cells and its transformant NIH3T3/KRAS cells<sup>1</sup> were cultured in DMEM (Sigma-Aldrich) containing 10% calf serum, glutamine (0.3 g/L), penicillin G (50 units/mL), and streptomycin (50 µg/mL). All cell lines were incubated at 37 °C in a humidified atmosphere containing 5% CO<sub>2</sub>.

### **Cell death assay**

The cells were seeded in 96-well plates, cultured overnight, and treated with test compounds for the indicated time. Subsequently, cell viability was measured by the WST-8 assay, using Cell Count Reagent SF (Nacalai Tesque) according to the manufacturer's instructions, with the measurement of absorbance set at 450 nm on the ARVO SX 1420 Multilabel Counter (Wallac).

### **Immunofluorescence**

The HeLa cells were seeded on glass coverslips in 12-well plates, cultured overnight, and treated with test compounds for the indicated time. For 8-oxo-dG, cells were fixed sequentially in 3.7% formalin for 10 min and methanol at -20 °C for 10 min, and then permeabilized in 0.5% Triton X-100 in PBS at room temperature for 5 min. After blocking with 0.5% BSA in PBS at room temperature for 30 min, cells were incubated sequentially with a primary antibody against 8-oxo-dG (5 µg/mL, MOG-020; Japan Institute for the Control of Aging) and with Alexa Fluor 488-conjugated secondary antibody (1:400, Life Technologies) under the same conditions. After a quick rinse in PBS, DNA was counterstained with 0.1 µg/mL 4',6-diamidino-2-phenylindole (DAPI) in PBS at room temperature for 10 min. Images were analyzed with a fluorescence microscope (BX60, Olympus).

For 53BP1, test compound-treated HeLa cells were fixed in 3% formalin in PBS containing 0.1% Triton X-100 for 15 min and permeabilized in 0.5% Triton X-100 for 5 min. After blocking with 10% FBS and 0.1% Triton X-100 in PBS for 1 h, cells were incubated sequentially with a primary antibody against 53BP1 (1:600, sc-22760; Santa Cruz Biotechnology) in blocking solution at 37 °C for 1 h and with Alexa Fluor 568-conjugated secondary antibody (1:400, Life Technologies) under the same condition. After a quick rinse in PBS, DNA was counterstained with 0.5 µg/mL Hoechst 33342 (Sigma-Aldrich) in PBS at room temperature for 10 min. Images were analyzed on a fluorescence microscope (Delta Vision).

For  $\alpha$ -tubulin, immunofluorescence was performed as described previously with several modifications<sup>2</sup>. Briefly, test compound-treated HeLa cells were fixed in 3.7% formalin for 1 min and methanol at -20 °C for 5 min sequentially, and permeabilized in 0.5% Triton X-100 in PBS for 5 min. After blocking with 0.5% BSA in PBS at room temperature for 30 min, cells were incubated sequentially with a primary antibody against  $\alpha$ -tubulin (1:200, T9026; Sigma-Aldrich) in the blocking solution at 37 °C for 1 h, and with Alexa Fluor 488-conjugated secondary antibody (1:400, Life Technologies) at 37 °C for 40 min. After a quick rinse in PBS, DNA was counterstained with 0.5 µg/mL Hoechst 33342 in PBS at room temperature for 10 min. Images were analyzed using a fluorescence microscope (Delta Vision).

### Cell cycle analysis

The HeLa cells were seeded in 12-well plates and treated with test compounds for the indicated time. Cells were harvested, washed with PBS, and incubated in propidium iodide (PI) solution containing 50 µg/mL propidium iodide, 0.1% sodium citrate, 0.2% Nonidet P-40, and 0.25 µg/mL RNase A (Nacalai Tesque) for 30 min in the dark. Cellular DNA content was analyzed by fluorescence-activated cell sorting using a Cytomics FC500 (Beckman Coulter).

### Supplementary References

- 1 Kawamura, T., Kondoh, Y., Muroi, M., Kawatani, M. & Osada, H. A small molecule that induces reactive oxygen species via cellular glutathione depletion. *Biochem. J.* **463**, 53-63 (2014).
- 2 Futamura, Y. *et al.* Morphobase, an encyclopedic cell morphology database, and

its use for drug target identification. *Chem. Biol.* **19**, 1620-1630 (2012).

**Supplementary Table S1. Chemical structures and MTH1 inhibitory activities of purine derivatives and known MTH1 inhibitors.**

| Compound       | Chemical structure                                                                  | IC <sub>50</sub> of MTH1 inhibitory activity (μM) |                 |
|----------------|-------------------------------------------------------------------------------------|---------------------------------------------------|-----------------|
|                |                                                                                     | 8-oxo-dGTP                                        | 2-OH-dATP       |
| NPD15095       | 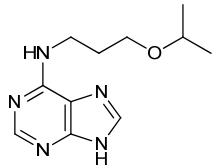   | 3.3 ± 0.6                                         | 6.7 ± 2.0       |
| NPD7155        |    | 0.21 ± 0.03                                       | 0.38 ± 0.16     |
| NPD9948        |    | 0.29 ± 0.05                                       | 0.50 ± 0.21     |
| NPD8880        |  | > 1,000                                           | > 1,000         |
| TH287          |  | 0.0022 ± 0.0003                                   | 0.0036 ± 0.0017 |
| TH588          |  | 0.011 ± 0.003                                     | 0.019 ± 0.008   |
| (S)-crizotinib |  | 0.39 ± 0.10                                       | 0.73 ± 0.33     |
| SCH51344       |  | 0.32 ± 0.04                                       | 0.75 ± 0.40     |

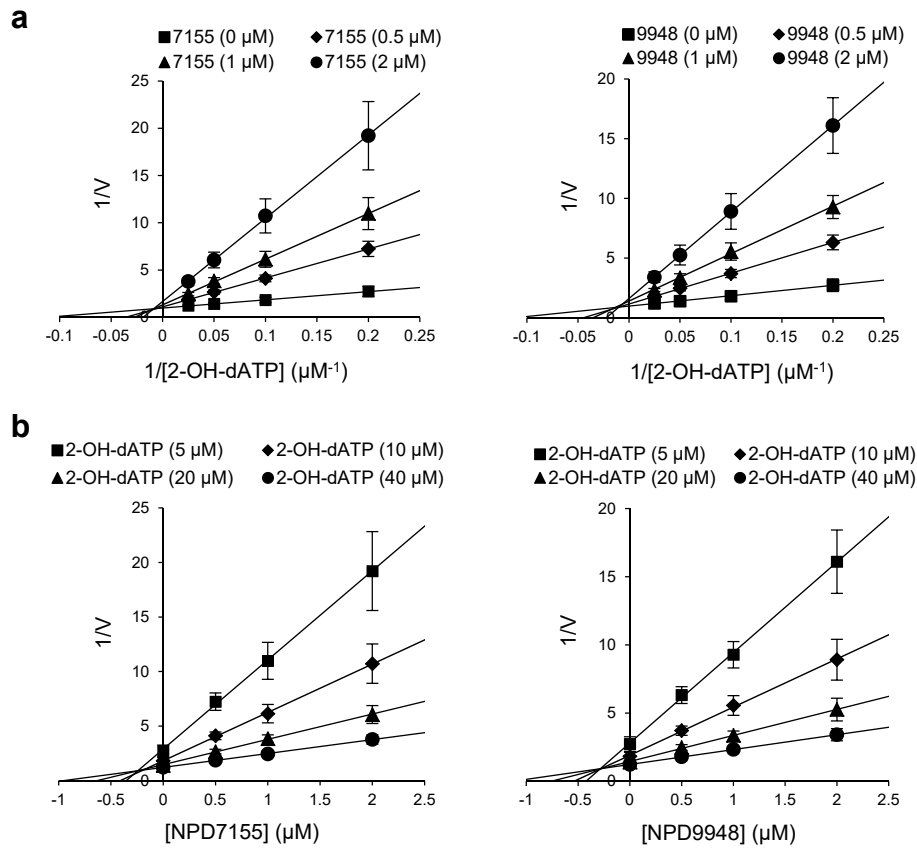

**Supplementary Fig. S1. Kinetic analysis for NPD7155 and NPD9948 against MTH1. (a)** Lineweaver–Burk plot of reciprocal of initial velocity vs. reciprocal of varying concentrations of 2-OH-dATP. 7155, NPD7155; 9948, NPD9948. **(b)** Dixon plot of initial velocity vs. varying concentrations of NPD7155 or NPD9948. Data are shown as mean  $\pm$  s.e.m. from three independent experiments.

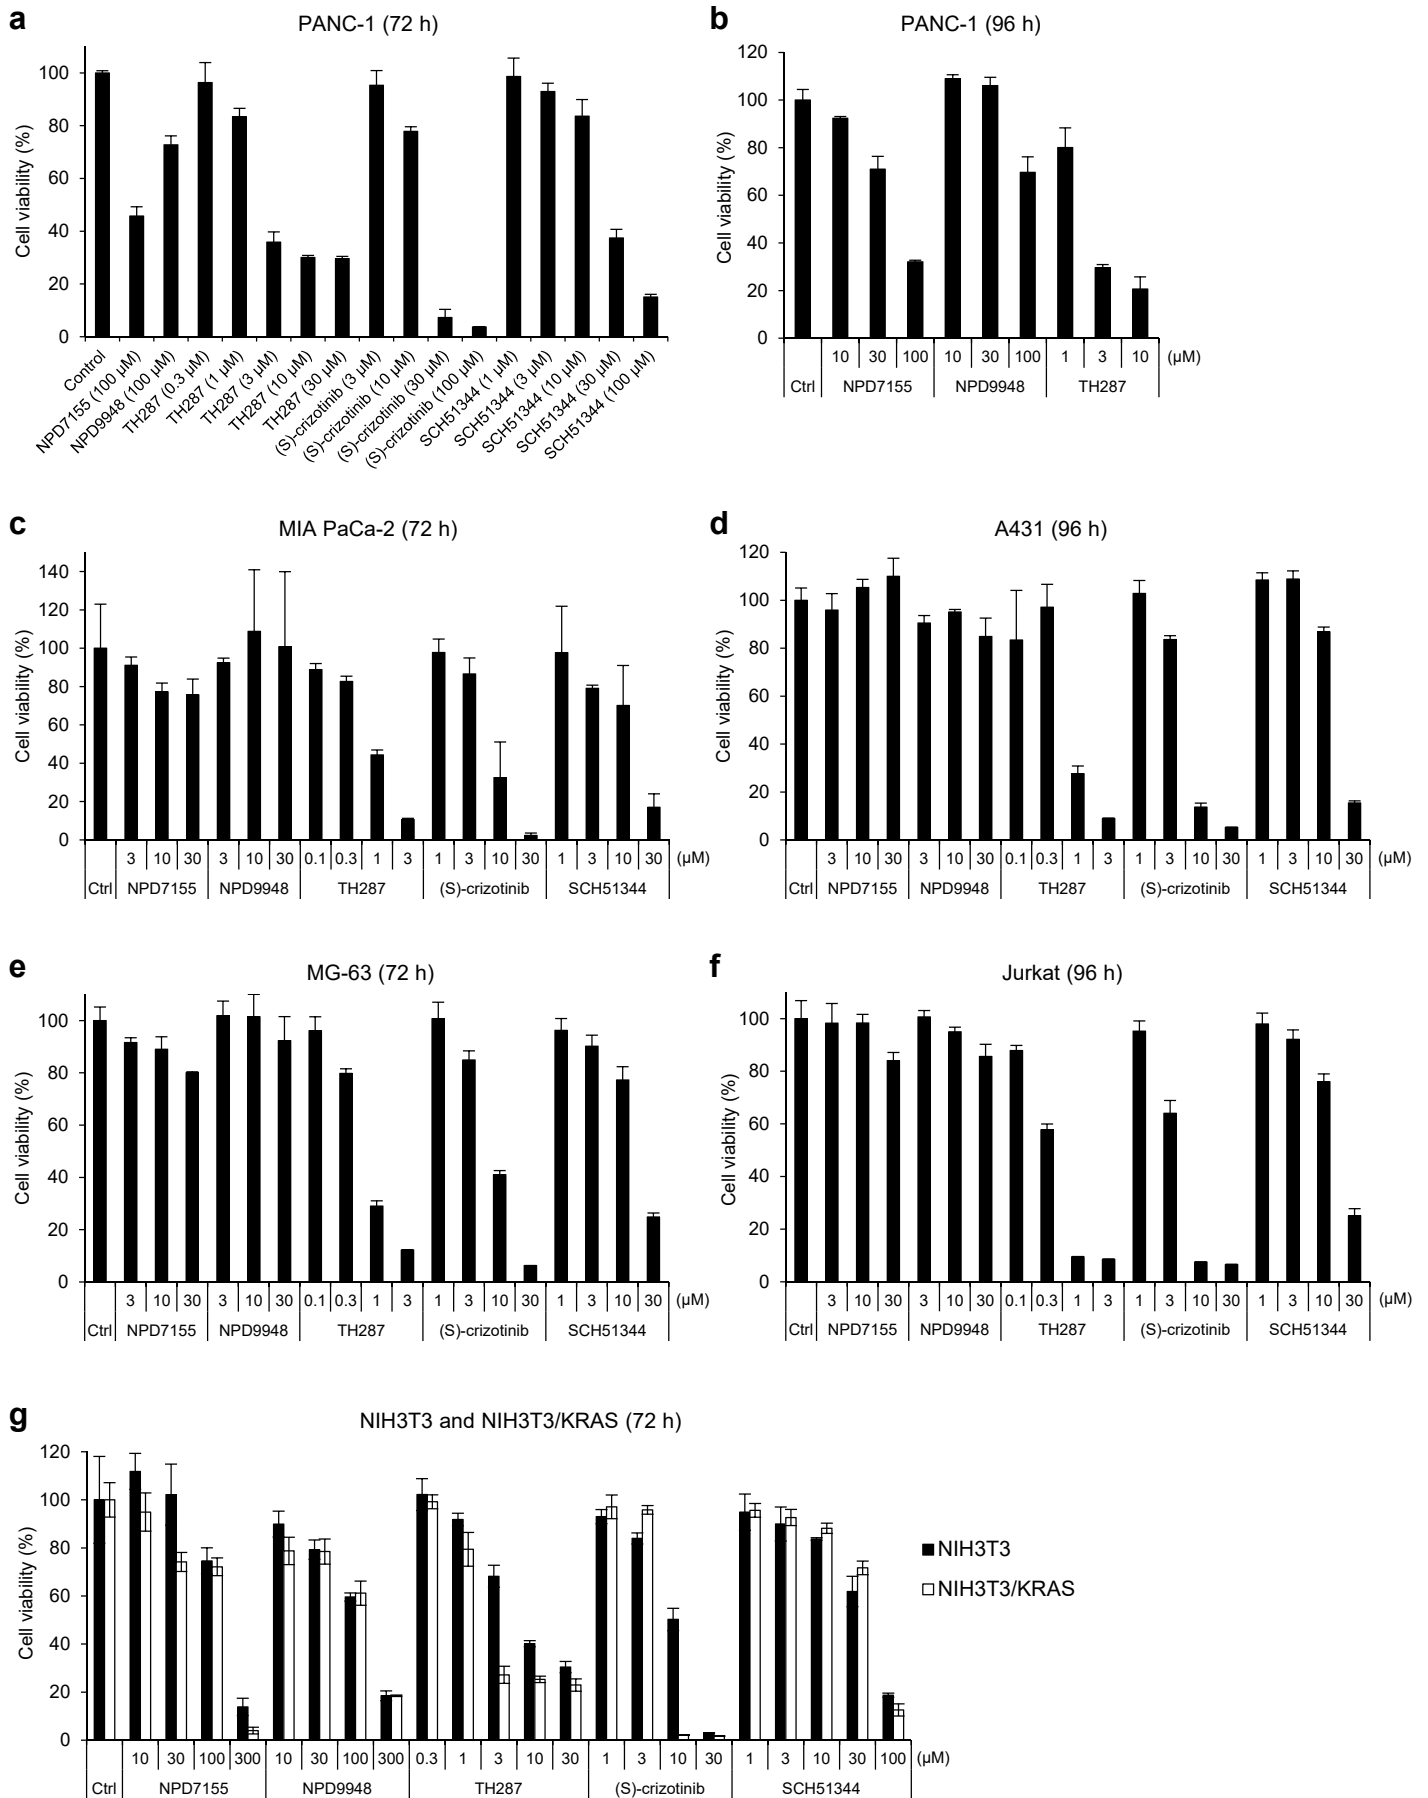

**Supplementary Fig. S2. NPD7155 and NPD9948 exhibit less potent cytotoxicity against cancer cell lines and KRAS-transformed fibroblast cells.** (a-g) The indicated cells were treated with MTH1 inhibitors for the indicated time. The cell viability was examined by WST-8 assay. Data are shown as mean  $\pm$  s.d.

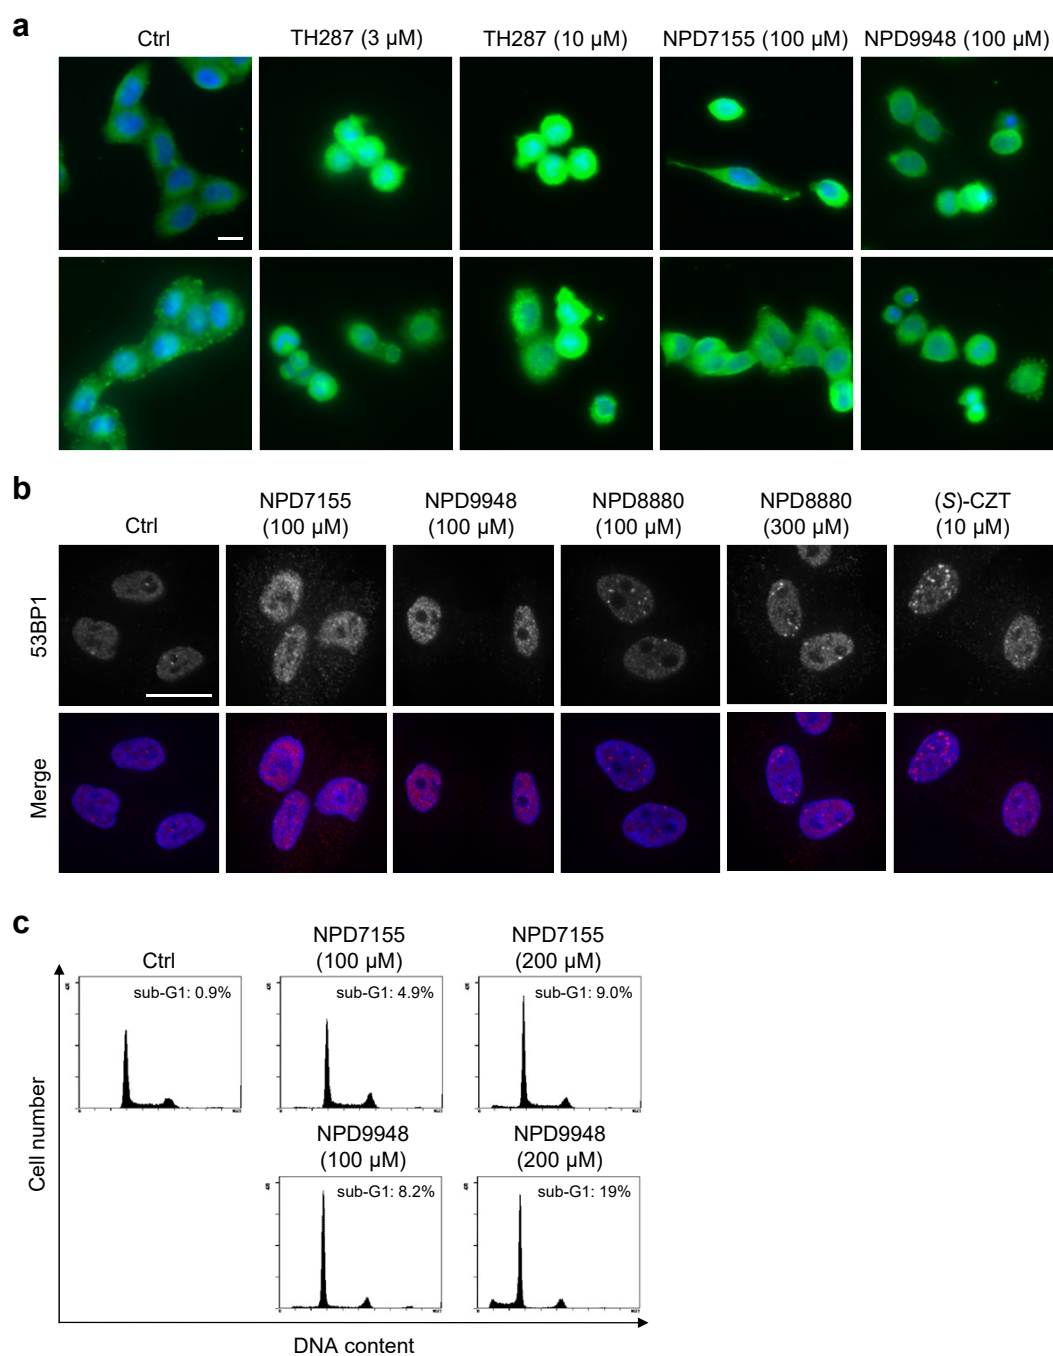

**Supplementary Fig. S3. Effects of NPD7155 and NPD9948 on 8-oxo-dG accumulation, DNA damage, and cell cycle progression.** (a) NPD7155 and NPD9948 hardly induce 8-oxo-dG accumulation. Images of accumulated 8-oxo-2'-deoxyguanosine (green) and DNA (blue) in HeLa cells treated with compounds for 20 h. Scale bar, 15  $\mu$ m. (b) NPD7155, NPD9948 and NPD8880 induce DNA damage. Images of induced 53BP1 foci (red) and DNA (blue) in HeLa cells treated with compounds for 24 h. Scale bar, 15  $\mu$ m. (c) Effects of NPD7155 and NPD9948 on cell cycle progression. HeLa cells were treated with the indicated compounds for 24 h, and analyzed by flow cytometry after propidium iodide staining.



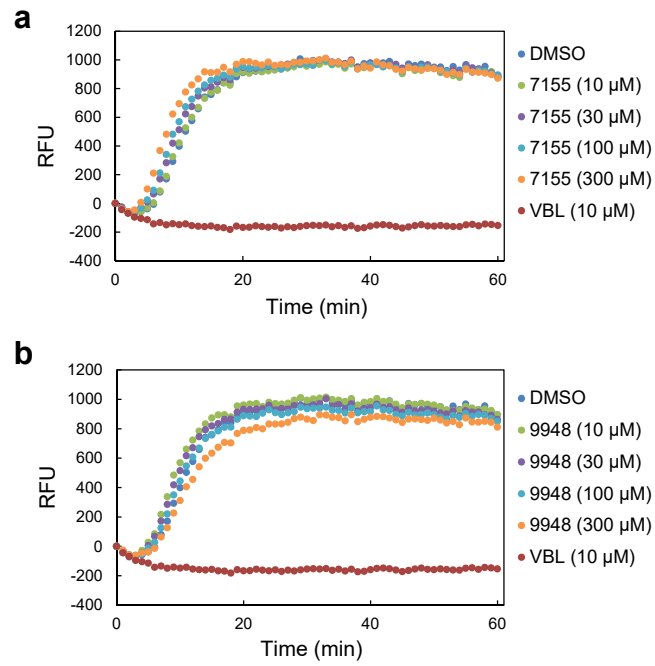

**Supplementary Fig. S4. Effects of NPD7155 and NPD9948 on *in vitro* tubulin polymerization.** (a, b) Effects of NPD7155 (7155) (a) and NPD9948 (9948) (b) on *in vitro* tubulin polymerization were determined. Vinblastine (VBL) was used as a positive control.

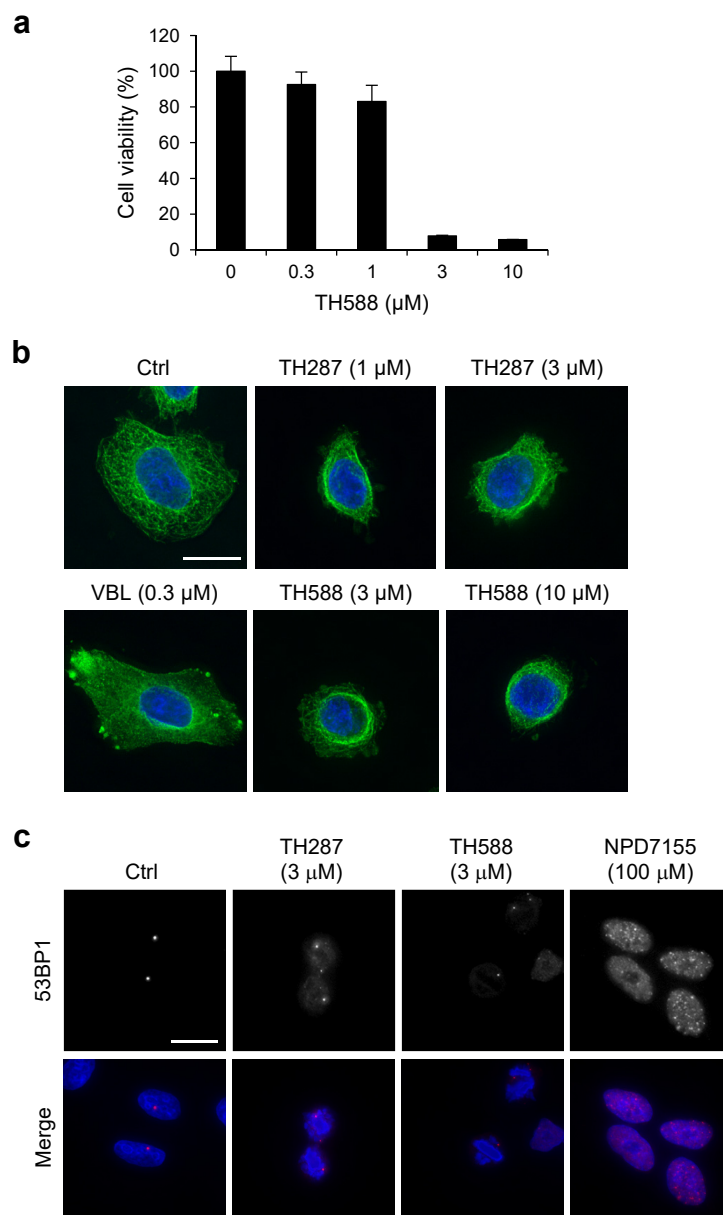

**Supplementary Fig. S5. Effects of TH287 and TH588 on interphase microtubules and DNA damage.** (a) Cytotoxicity of TH588. HeLa cells were treated with TH588 at the indicated concentrations for 72 h. Cell viability was measured by WST-8 assay. Data are shown as mean  $\pm$  s.d. (b) Effects on interphase microtubules. Images of  $\alpha$ -tubulin (green) and DNA (blue) in HeLa cells treated with compounds for 6 h. Scale bar, 15  $\mu$ m. (c) Images of induced 53BP1 foci (red) and DNA (blue) in HeLa cells treated with compounds for 24 h. Scale bar, 15  $\mu$ m.

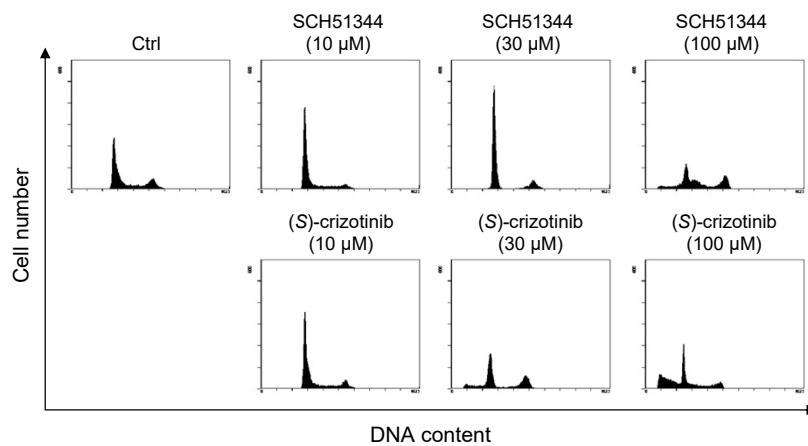

**Supplementary Fig. S6. Effects of SCH51344 and (S)-crizotinib on cell cycle progression.** HeLa cells were treated with the indicated compounds for 24 h, and analyzed by flow cytometry after propidium iodide staining.

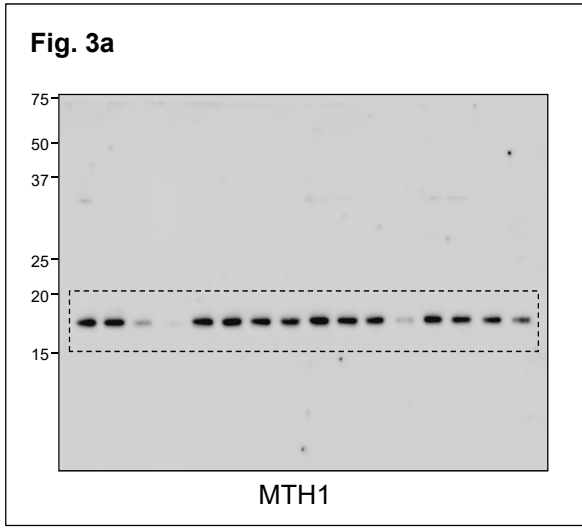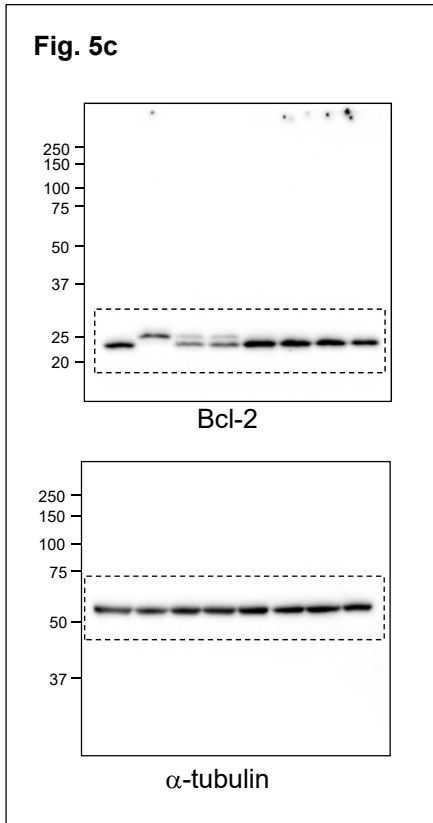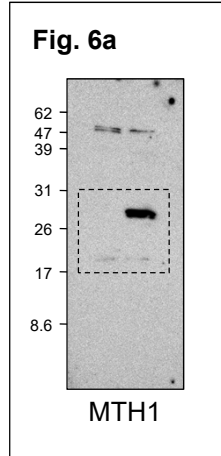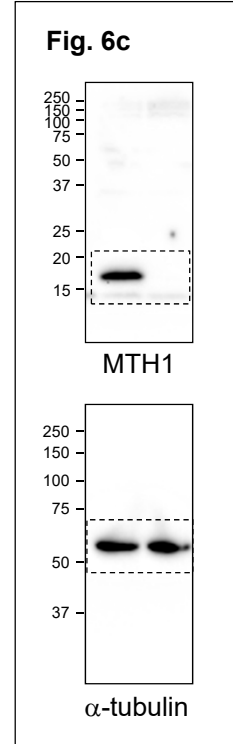

**Supplementary Fig. S7. Uncropped images of western blots accompanied by molecular size markers (kDa).**
